# Supplementary material
Source: PubMed Central journal article supplement (PMC2862410)
Supplement: pp.109.149922_1.pdf [file pp.109.149922_1.pdf]

# Figure S1

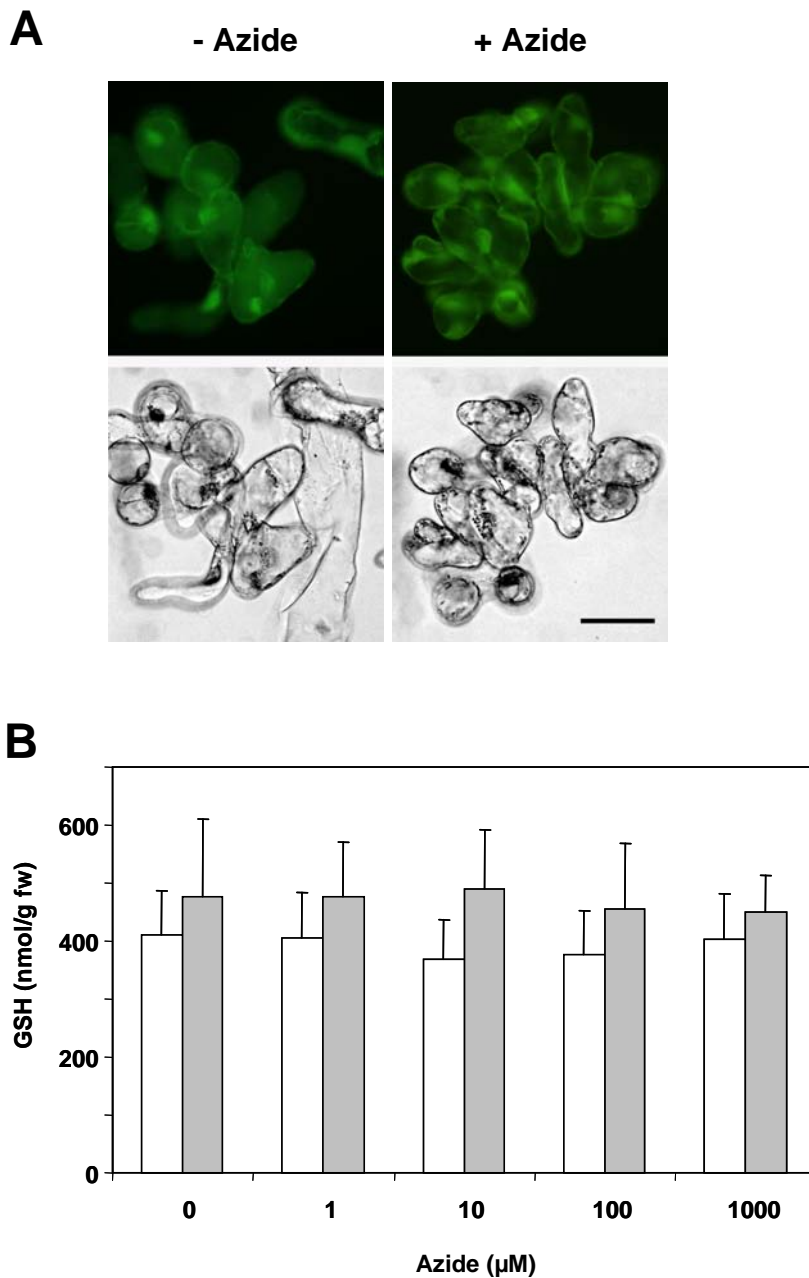

**Figure S1.** Effect of azide on Arabidopsis suspension cells.

A) Vital staining of Arabidopsis suspension cells with fluorescein diacetate. In the presence of 1 mM azide no indication for an impaired cell integrity was observed within the incubation time of 2 hours. The upper row shows fluorescein-stained Arabidopsis cells, the lower row depicts the corresponding bright-field images. The bar corresponds to 0.2 mm.

B) The levels of reduced GSH (white columns) and reduced/oxidized GSH combined (gray columns) were analyzed. Data points show the mean of the amounts of GSH detected in five independent experiments with SD. No significant alteration of GSH levels was observed in the presence of azide.
